# Supplementary material for: A light-emitting electrochemical cell (LEC) containing a hole-blocking layer of TmPyPB
Source: Royal Society of Chemistry journal article supplement (doi:10.1039/c8tc02314j), 2018-01-01
Supplement: c8tc02314j1.pdf [file c8tc02314j1.pdf]

## Electronic Supplementary Information

### Light Emitting Electrochemical Cell (LEC) containing a Hole Blocking Layer of TmPyPB

Miriam Di Marcantonio <sup>a,b,c,†</sup>, Frank Vollkommer <sup>b</sup>, Gerd Bacher <sup>c</sup>, Ekaterina Nannen <sup>a,c</sup>

*a.* Research Group „Solid State Lighting“, NanoEnergieTechnikZentrum, University Duisburg-Essen, Carl-Benz-Str. 199, Duisburg 47057, Germany.

*b.* OSRAM GmbH, Corporate Innovation, Advanced Technology, Parkring 33, Garching 85748 Garching, Germany.

*c.* Werkstoffe der Elektrotechnik and CENIDE, University Duisburg-Essen, Bismarckstr. 81, Duisburg 47057, Germany

<sup>†</sup> Email - miriam.di-marcantonio@stud.uni-due.de

Figure S 1 shows the 3D surface maps of the TmPyPB (a) and TmPyPB:P4VP (b) layers deposited on glass substrates, measured by NanoFocus optical surface profilometer. The sample with TmPyPB:P4VP shows a smoother and more homogeneous surface compared to the sample without the polymer (the averaged ( $S_a$ ) and root mean squared ( $S_q$ ) surface roughness values are reported directly in the figure).

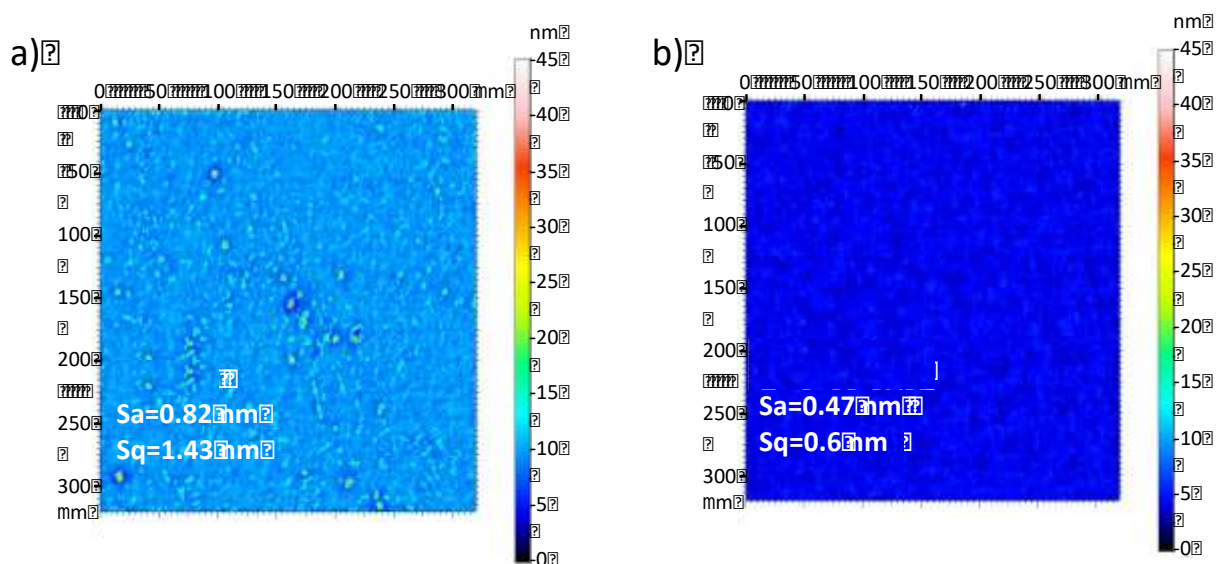

**Figure S 1** 3D maps of TmPyPB (a) and TmPyPB:P4VP (b) layer spin coated on glass substrates.

The normalized electroluminescence spectra of Ref. LEC and Hybrid LEC using an HBL of TmPyPB, taken at 4 V, are shown in Figure S 2. The EL maximum of the reference LEC is at 585 nm and only a minor 4 nm blue shift of peak of the hybrid device can be observed (581 nm).

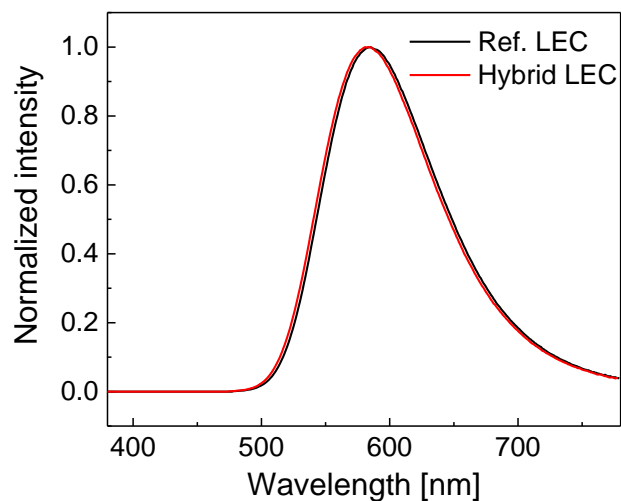

**Figure S 2** Normalized electroluminescence spectra of the Ref. LEC (black line) and the Hybrid LEC (red line) using a HBL of TmPyPB taken at 4 V.
